# Supplementary material for: Comprehensive analysis of structural and sequencing data reveals almost unconstrained chain pairing in TCRαβ complex
Source: PubMed Central journal article supplement (PMC7093030; doi:10.1371/journal.pcbi.1007714), 2020-03-12
Supplement: pcbi.1007714.s001.pdf [file pcbi.1007714.s001.pdf]

# Supplementary Figures and Tables (S1 Appendix)

**Fig A. Amino acid pairing statistics at contacting residues.** **a.** Scatter-plot of  $\chi^2$  statistic values versus mutual information for AA pair frequency matrices of each contacting residue pair. **b.** Mutual information is negatively correlated with conservation (information content) of V and J germline residues. **c.** Scatterplot of residue pair contact frequencies and mutual information of AA pair frequency matrices.

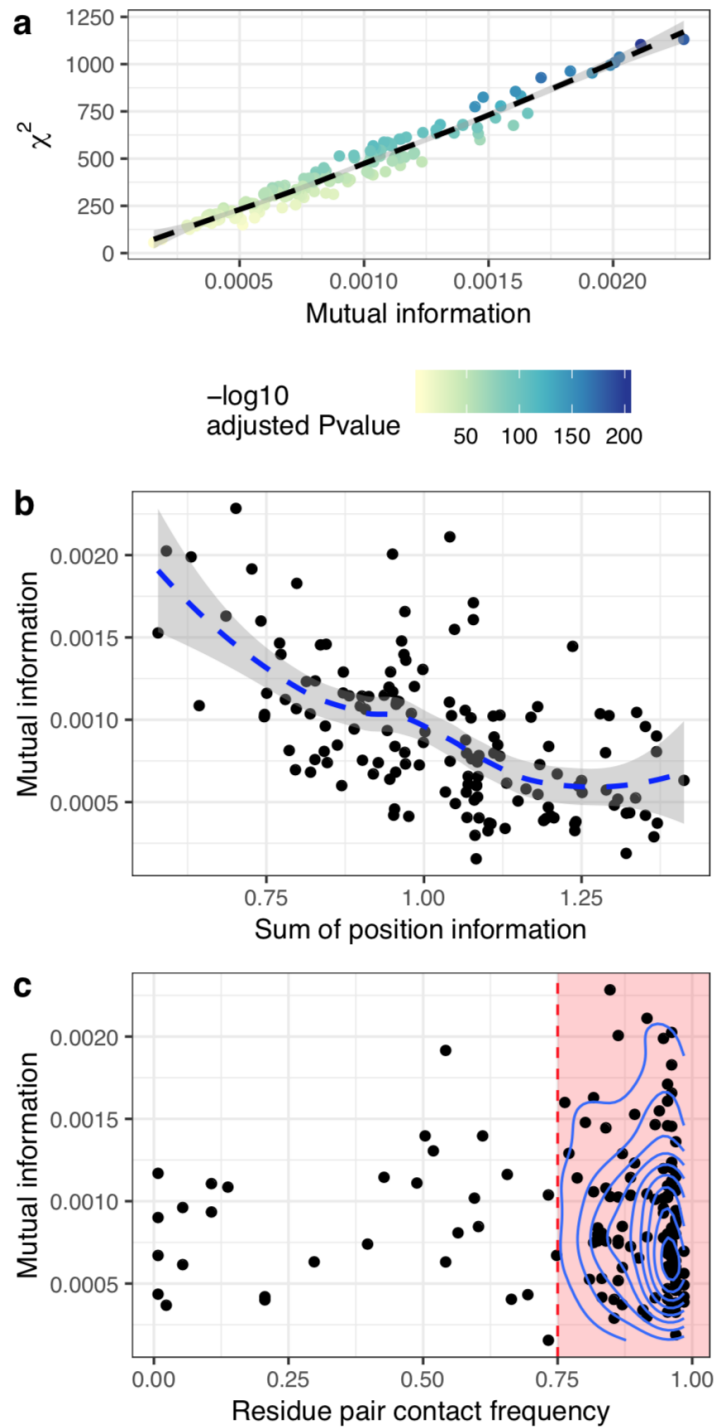

**Fig B. A case of an indirect correlation between residue amino acid profiles. a.** Contact frequency,  $\chi^2$  and mutual information for various TCR $\alpha$  residues contacting  $\beta_{101}$ . Note that  $\alpha_{47}$  is contacted  $\sim 95\%$  of times, while  $\alpha_{43}$  is only contacted at a rate of  $\sim 11\%$ . **b.** Tables of observed to expected contact count ratios showing highly non-random profiles for Histidine in  $\alpha_{43}$  and Tryptophan in  $\alpha_{47}$ . The correlation between these two table columns is  $R \approx 1$ . **c.** Co-occurrence of amino acids between  $\alpha_{43}$  and  $\alpha_{47}$  in the set of human V genes. Numbers indicates the quantity of V genes with a given combination. The gene having Histidine and Tryptophan in corresponding positions is highlighted with a red box.

**a**

|   | TRA residue index | Contact frequency | ChiSQ | MI     |
|---|-------------------|-------------------|-------|--------|
| 1 | 47                | 0.95              | 928   | 0.0017 |
| 2 | 46                | 0.94              | 779   | 0.0015 |
| 3 | 43                | 0.11              | 580   | 0.0011 |
| 4 | 49                | 0.95              | 500   | 0.001  |
| 5 | 39                | 0.01              | 343   | 7e-04  |

**b**

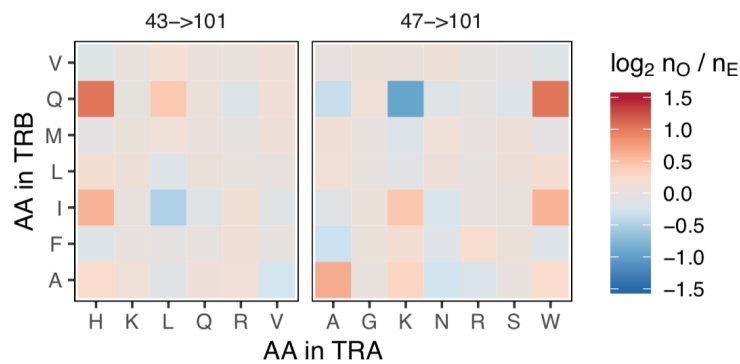

**c**

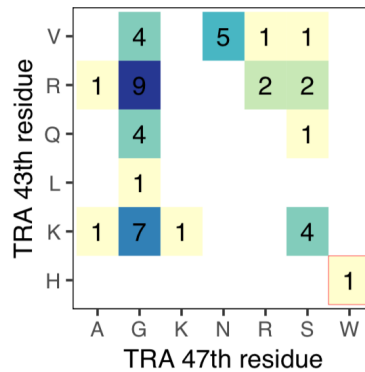

**Fig C. Bayes network of residue amino acid profiles.** The plot shows a graph encoding dependencies between amino acid profiles of all TCR $\alpha\beta$  complex residues built for the entire PairSEQ dataset with no constraints on allowed and disallowed edges. Black and red nodes show TCR $\alpha$  and TCR $\beta$  residues respectively. The only inter-chain contacts inferred are  $\beta_{108}\rightarrow\alpha_{37}$ , and  $\alpha_{46}\rightarrow\beta_{10}$ .

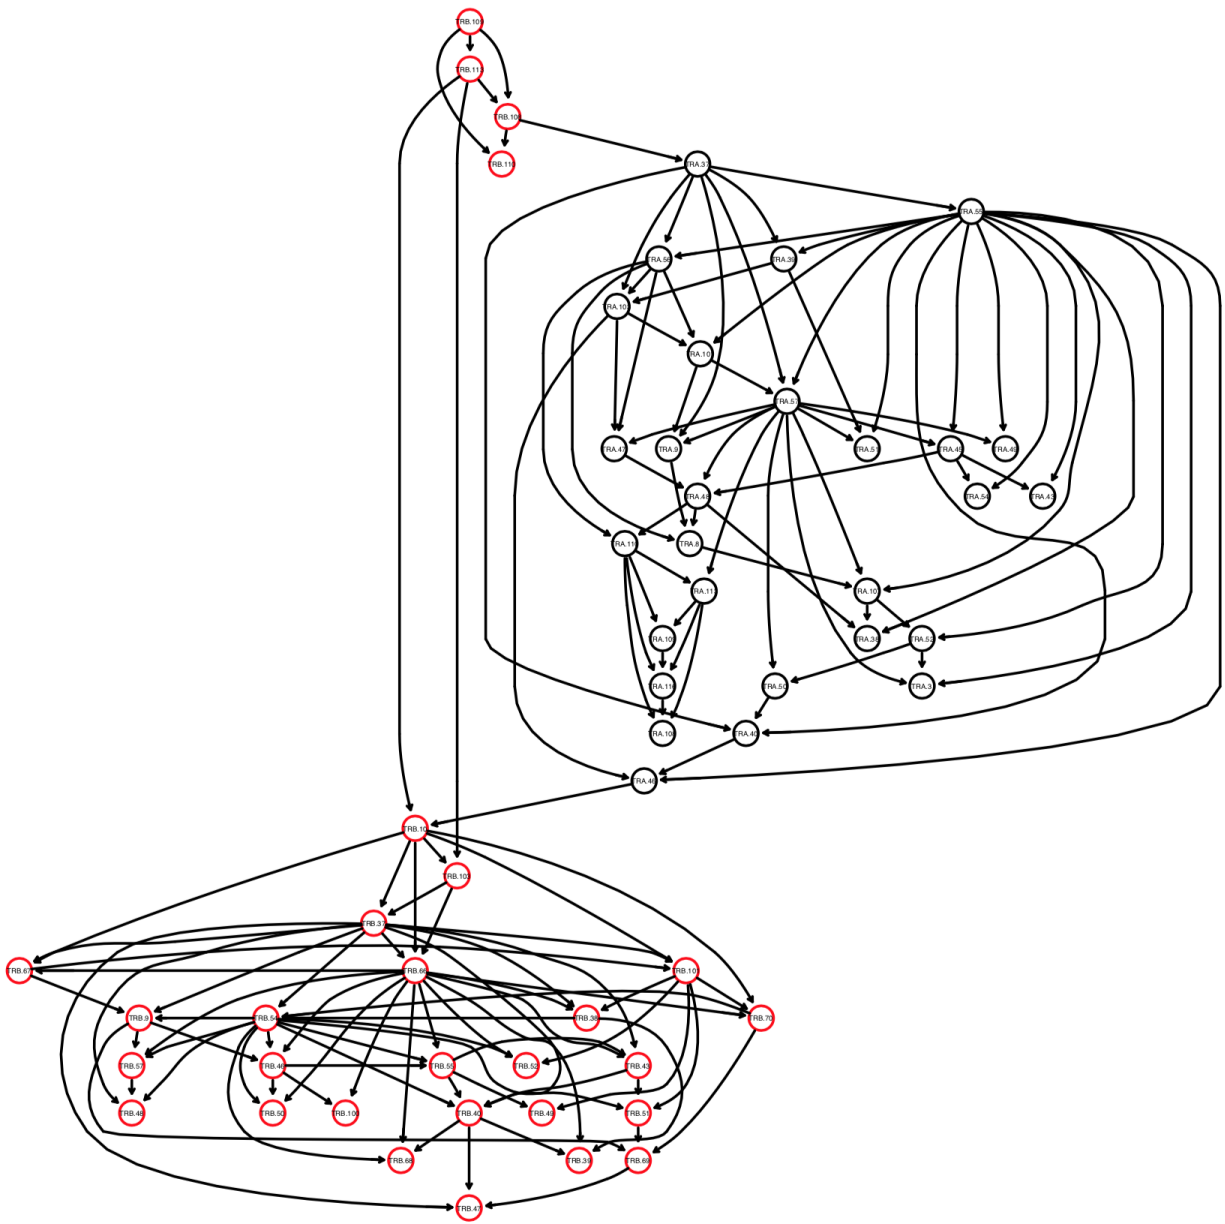

**Fig D. Bayes network of inter-chain contacts.** The plot shows a graph encoding dependencies between amino acid profiles of selected contacting residues built for the entire PairSEQ dataset with only inter-chain residue edges allowed. Black and red nodes show TCR $\alpha$  and TCR $\beta$  residues respectively.

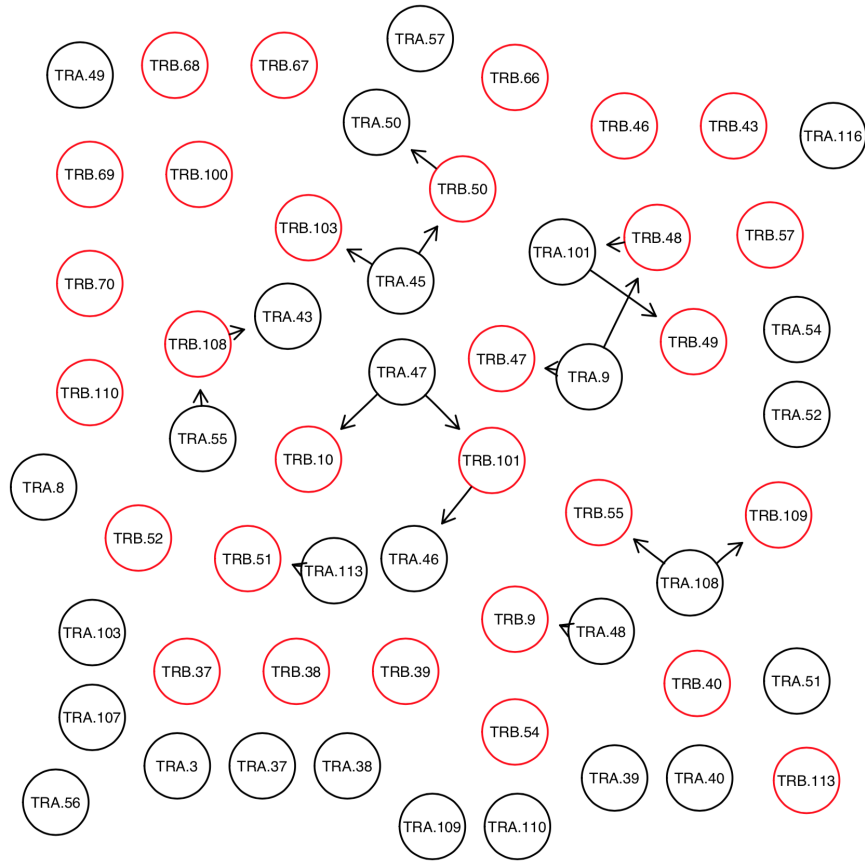

**Fig E. Contact map with inferred direct  $\alpha\beta$  contacts.** A contact map of TCR $\alpha\beta$  complexes with contacting residue pairs inferred by Bayes network (BN) analysis shown in **Fig D** highlighted with labels. Greater (>) and less (<) signs show node directionality in BN, first and second numbers in node label represent  $\alpha$  and  $\beta$  chain residue indices respectively. Node color shows mutual information of amino acid pair frequency matrices. Node size represents contact frequency for residue pairs inferred from structural data, grey nodes are the ones that fall below 0.75 contact frequency threshold.

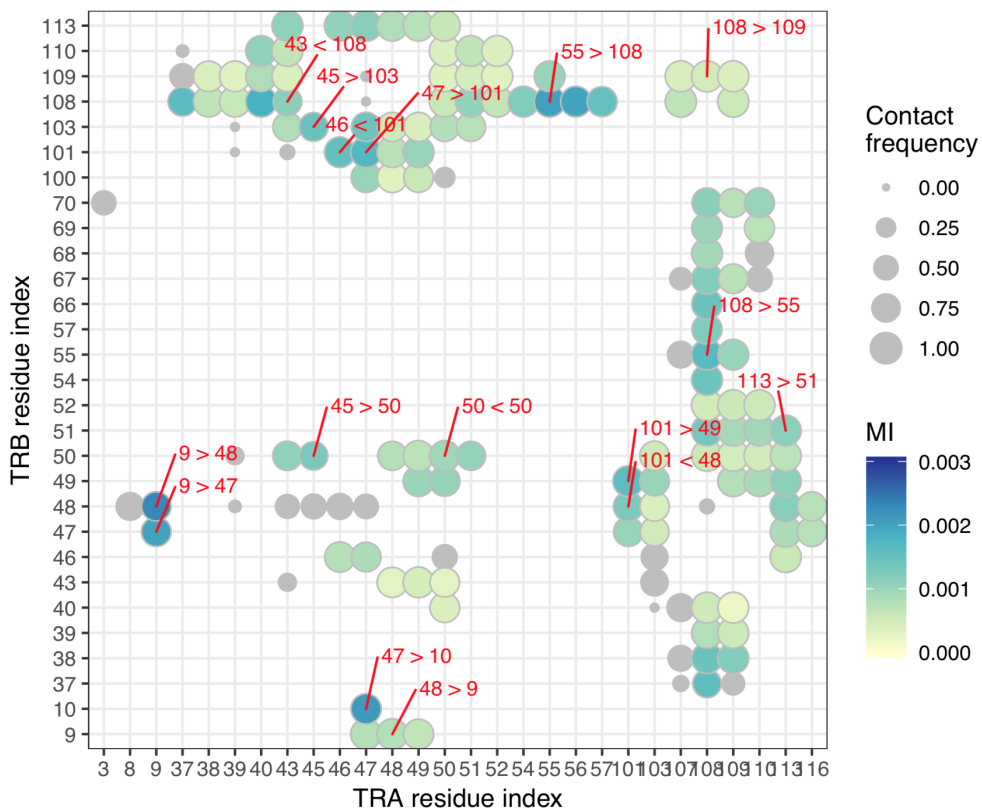

**Fig F. Representative conditional probabilities learned using Bayes network.** Conditional probabilities for residue  $\alpha_{101}$  given residue  $\alpha_{55}$  (green labels above panels) and residue  $\beta_{48}$  (orange labels). Subtle differences for e.g. Leucine (L) at  $\alpha_{101}$  between Glycine (G) and Lysine (K) at  $\beta_{48}$  given Isoleucine (I) at  $\alpha_{55}$  can be noted.

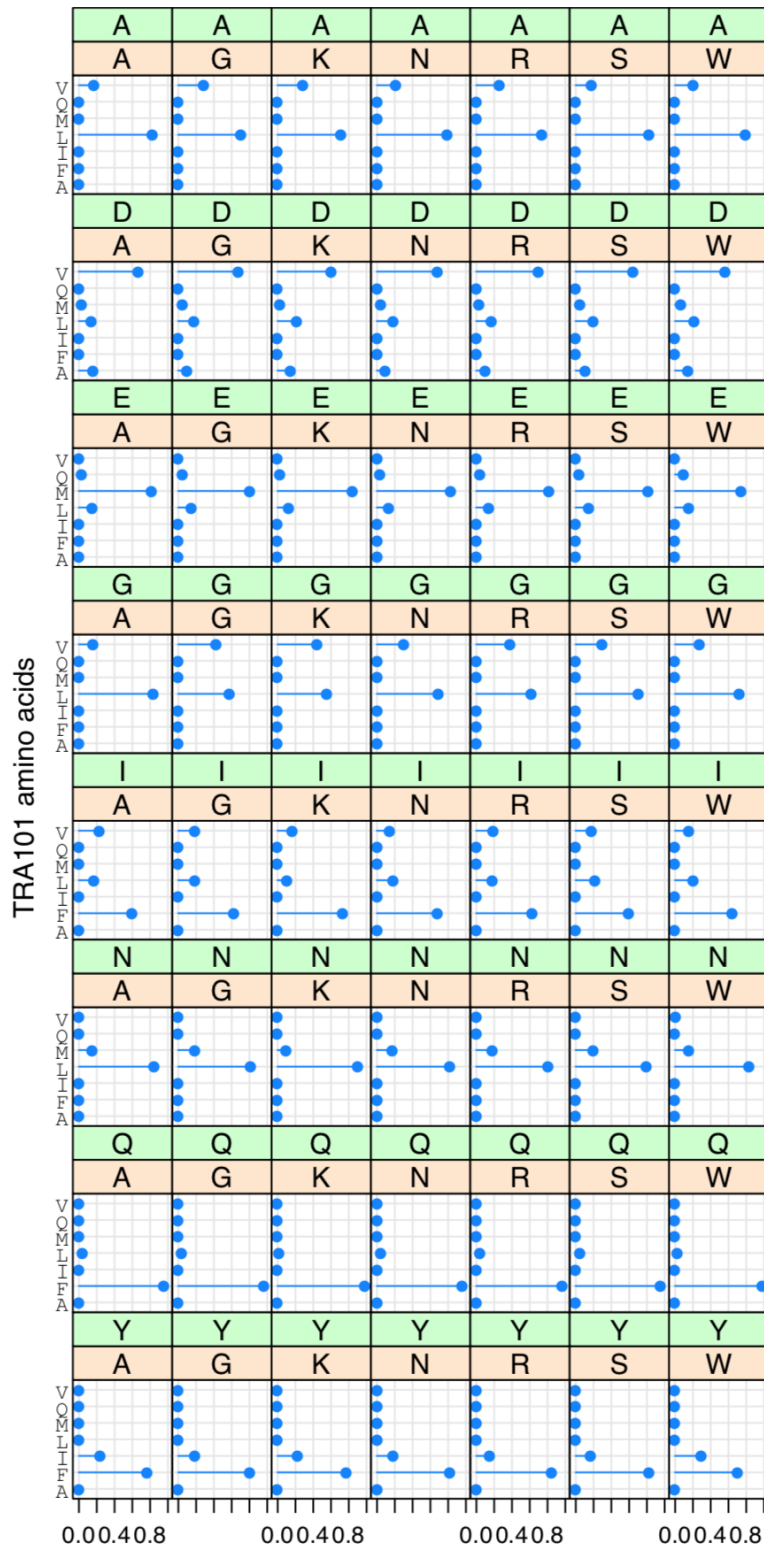

**Fig G. Classifying amino acids based on their physicochemical features.** Using PCA to perform placement and clustering of amino acids based on their physicochemical properties. K-means clustering with k=5 was performed to separate amino acids into 5 distinct groups.

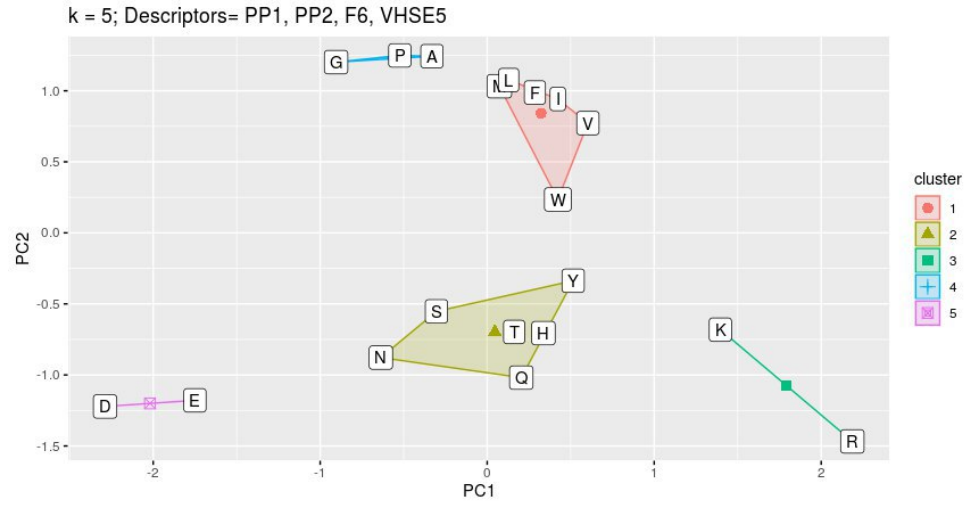

**Fig H. Exploring Euler angles between TCR alpha and beta chains.** **a.** A schematic definition of angles between  $\alpha$  and  $\beta$  chains. Principal axes ( $x_\alpha, y_\alpha, z_\alpha$ ) and ( $x_\beta, y_\beta, z_\beta$ ) of both TCR chains are computed using the inertia tensor of all atoms of a given chain with the exception of constant domain atoms (top panel); representative orientation of principal axes in real TCR:pMHC complex are shown. Euler angles  $\varphi_{1,2,3}$  are then computed by superimposing chain centers of mass and computing angles between  $\alpha$  and  $\beta$  principal axes (bottom panel). Illustrations were adapted from Wikimedia Commons (<https://commons.wikimedia.org/wiki/File:63-T-CellReceptor-MHC.tif> by David Goodsell and <https://commons.wikimedia.org/wiki/File:Eulerangles.svg> by Lionel Brits). **b.** and **c.** - scatter plots of  $\varphi_1$  and  $\varphi_3$  angles between  $\alpha$  and  $\beta$  chains in complexes having  $\alpha_{50} \rightarrow \beta_{50}$  and  $\alpha_{108} \rightarrow \beta_{55}$  contacts respectively. Note the differences in orientation between chains of TCR $\alpha\beta$  complexes: difference in  $\varphi_1$  angle between chains for complexes having either Proline (P) or other residue at  $\beta_{50}$  (**b**), and difference in  $\varphi_3$  angle for complexes having either Isoleucine (I) or Asparagine (N) at  $\alpha_{108}$  (**c**). The (**b**) panel shows that the presence of Proline at  $\beta_{50}$  residue substantially restricts the available  $\varphi_1$  angle value range:  $8^\circ$  vs  $44^\circ$  on average for Proline versus any other residue ( $P < 10^{-8}$ , two-tailed T-test). On the other hand, panel (**c**) demonstrates that the choice of either Isoleucine or Asparagine at  $\alpha_{108}$  residue leads to substantially different  $\varphi_3$  angle values,  $11^\circ$  and  $31^\circ$  on average respectively ( $P < 10^{-3}$ , two-tailed T-test). However, these observations are severely biased by the presence of structures with redundant TCRs in the PDB dataset: for complexes shown in (**b**) panel 7/8 complexes with N at  $\alpha_{108}$  are TRAV27/TRAJ42/TRBV19/TRBJ2-7 and 7/9 complexes with I at  $\alpha_{108}$  are TRAV21/TRAJ6/TRBV6-5/TRBJ2-2. This redundancy can explain highly significant P-values when comparing inter-chain angles.

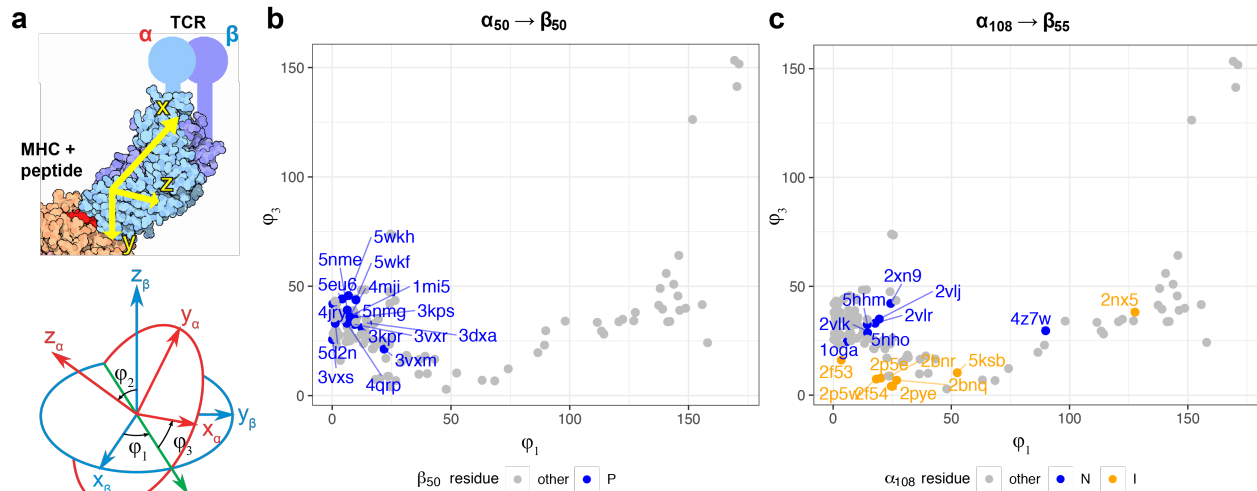



**Fig I. Details of inter-chain contacts that influence mutual orientation of TCR alpha and beta chains.** **a.** Contacting residues at alpha chain positions 40, 42, 55 and 57 (IMGT numbering). Note that different residues are forming inter-chain contacts in representative TCR:pMHC structures. **b.** Similar to **Fig 5d**, but colored by a combination of amino acid types at TCR alpha residues #42 and #57, highlighting potential combinatorial effect from several TCR alpha residues.

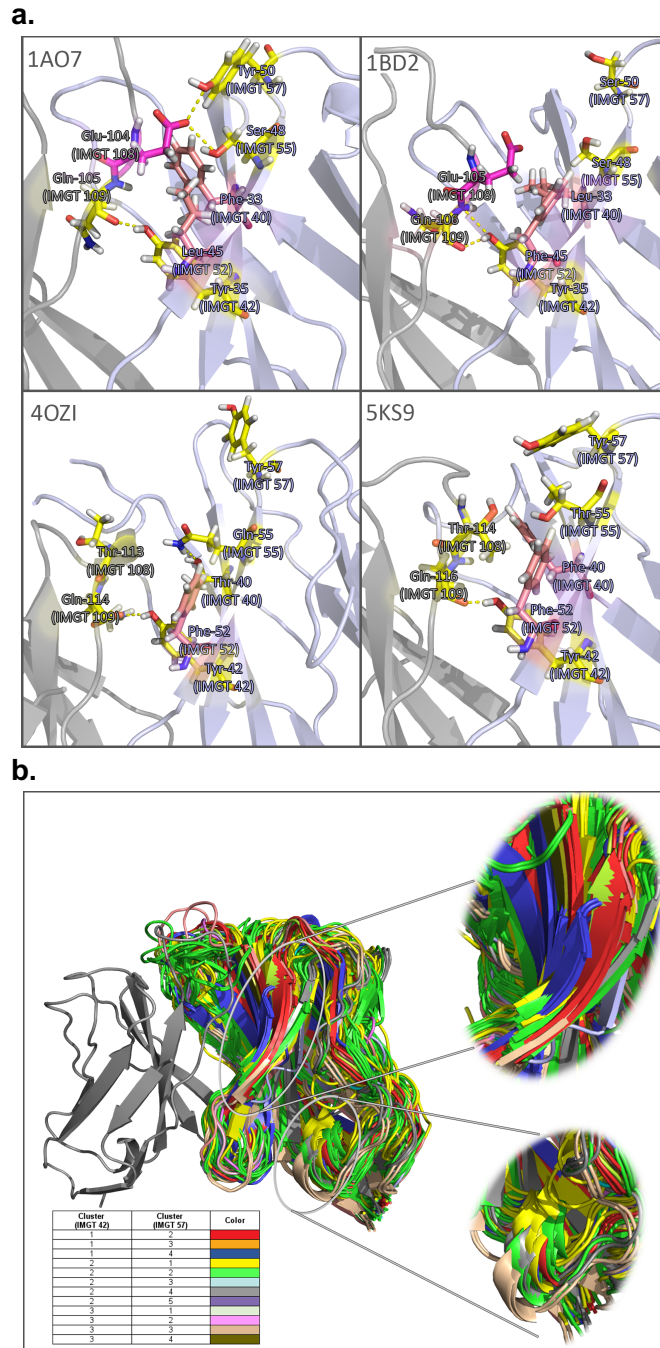

**Fig J. Correlation analysis of CDR3 features of paired TCR alpha and beta chains.** CDR3 length and means of Kidera factors (KF1-10) are shown. Pearson correlation coefficients between alpha and beta chain values and corresponding Bonferroni-adjusted P-values are provided above each subplot.

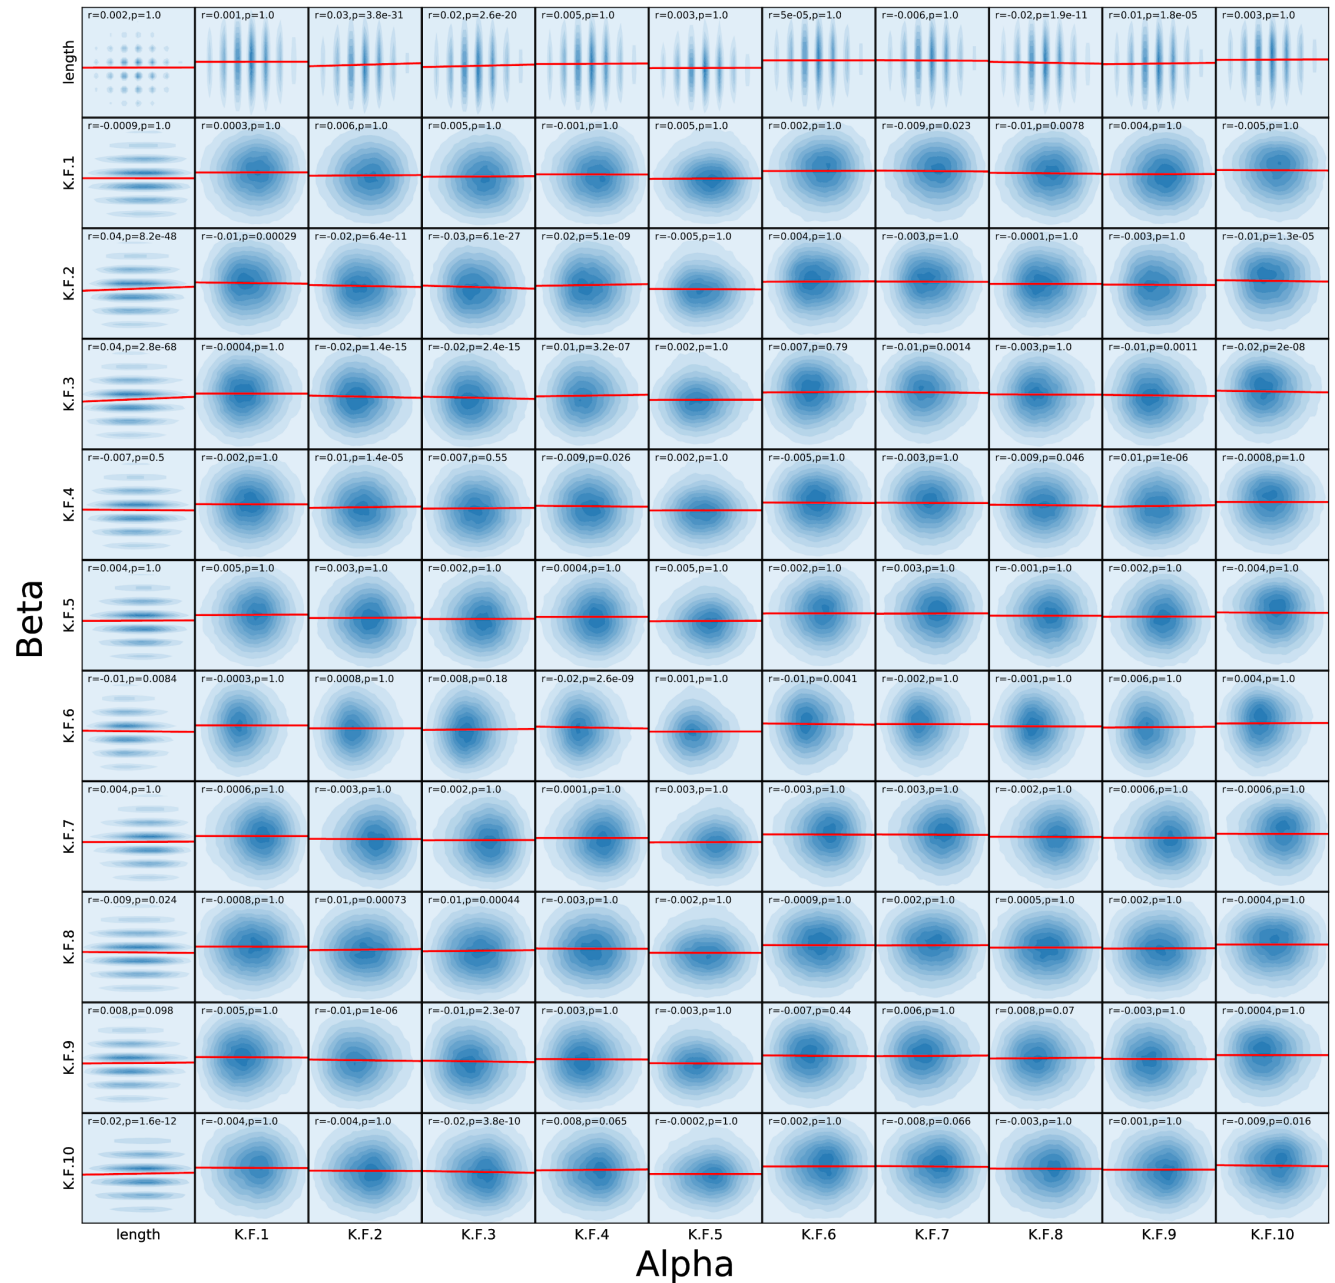

**Table A. Table of enriched V/J gene trios.** Cluster ID specifies groups of trios that have overlapping genes. Known subset specifies canonical MAIT or iNKT rearrangements. Observed (obs) and expected (exp, given random alpha-beta pairing) counts are shown for the PairSEQ dataset. A multiple testing-adjusted P-value of a hypergeometric enrichment test is provided for each gene trio.

| Cluster ID              | Va        | Ja     | Vb       | Jb      | Known subset | Count (obs) | Count (exp) | Adjusted P-value |
|-------------------------|-----------|--------|----------|---------|--------------|-------------|-------------|------------------|
| Va8-3 Ja10 Vb2 Jb2-7    | X         | TRAJ10 | TRBV2    | TRBJ2-7 |              | 85          | 35          | 4.3E-08          |
| Va8-3 Ja10 Vb2 Jb2-7    | TRAV8-3   | TRAJ10 | TRBV2    | X       |              | 45          | 15          | 1.4E-05          |
| Va41 Ja49 Vb5-1 Jb1-2   | TRAV41    | TRAJ49 | TRBV5-1  | X       |              | 60          | 26          | 7.3E-05          |
| Va41 Ja49 Vb5-1 Jb1-2   | TRAV41    | X      | TRBV5-1  | TRBJ1-2 |              | 43          | 18          | 1.2E-02          |
| Va39 Ja40 Vb9 Jb2-1     | TRAV39    | X      | TRBV9    | TRBJ2-1 |              | 72          | 32          | 3.7E-05          |
| Va39 Ja40 Vb9 Jb2-1     | TRAV39    | TRAJ40 | TRBV9    | X       |              | 31          | 10          | 4.4E-04          |
| Va29DV5 Vb5-1           | TRAV29DV5 | TRAJ39 | TRBV5-1  | X       |              | 56          | 21          | 4.3E-06          |
| Va29DV5 Vb5-1           | TRAV29DV5 | TRAJ6  | TRBV5-1  | X       |              | 22          | 4           | 5.1E-06          |
| Va29DV5 Vb5-1           | TRAV29DV5 | X      | TRBV5-1  | TRBJ1-5 |              | 55          | 24          | 7.6E-04          |
| Va29DV5 Vb5-1           | TRAV29DV5 | X      | TRBV5-1  | TRBJ2-1 |              | 168         | 110         | 1.1E-02          |
| Va29DV5 Vb5-1           | TRAV29DV5 | TRAJ52 | TRBV5-1  | X       |              | 52          | 24          | 1.7E-02          |
| Va29DV5 Vb18 Jb1-1      | TRAV29DV5 | X      | TRBV18   | TRBJ1-5 |              | 66          | 26          | 5.1E-07          |
| Va29DV5 Vb18 Jb1-1      | TRAV29DV5 | X      | TRBV18   | TRBJ1-1 |              | 89          | 44          | 3.3E-05          |
| Va29DV5 Vb18 Jb1-1      | TRAV29DV5 | X      | TRBV18   | TRBJ1-2 |              | 70          | 31          | 1.0E-04          |
| Va29DV5 Vb18 Jb1-1      | TRAV29DV5 | TRAJ24 | TRBV18   | X       |              | 19          | 5           | 5.8E-03          |
| Va29DV5 Vb18 Jb1-1      | TRAV29DV5 | X      | TRBV18   | TRBJ1-6 |              | 40          | 17          | 1.9E-02          |
| Va26-2 Ja43 Vb7-8 Jb1-5 | TRAV26-2  | X      | TRBV7-8  | TRBJ1-5 |              | 38          | 13          | 1.5E-03          |
| Va26-2 Ja43 Vb7-8 Jb1-5 | TRAV26-2  | TRAJ43 | TRBV7-8  | X       |              | 27          | 8           | 2.6E-03          |
| Va26-1 Vb20-1           | TRAV12-3  | X      | TRBV20-1 | TRBJ2-3 |              | 260         | 149         | 0.0E+00          |
| Va26-1 Vb20-1           | TRAV26-1  | X      | TRBV20-1 | TRBJ1-1 |              | 216         | 113         | 0.0E+00          |
| Va26-1 Vb20-1           | TRAV26-1  | X      | TRBV20-1 | TRBJ1-3 |              | 97          | 35          | 0.0E+00          |
| Va26-1 Vb20-1           | TRAV26-1  | X      | TRBV20-1 | TRBJ2-1 |              | 368         | 237         | 1.6E-11          |
| Va26-1 Vb20-1           | TRAV13-1  | TRAJ17 | TRBV20-1 | X       |              | 90          | 38          | 1.6E-10          |
| Va26-1 Vb20-1           | X         | TRAJ10 | TRBV20-1 | TRBJ1-4 |              | 46          | 12          | 9.6E-10          |
| Va26-1 Vb20-1           | X         | TRAJ17 | TRBV20-1 | TRBJ1-2 |              | 122         | 58          | 6.4E-09          |
| Va26-1 Vb20-1           | TRAV12-3  | TRAJ18 | TRBV6-4  | X       |              | 14          | 1           | 9.5E-09          |
| Va26-1 Vb20-1           | TRAV26-1  | X      | TRBV20-1 | TRBJ1-2 |              | 199         | 118         | 1.4E-07          |
| Va26-1 Vb20-1           | TRAV12-3  | TRAJ17 | TRBV20-1 | X       |              | 75          | 33          | 5.7E-07          |
| Va26-1 Vb20-1           | X         | TRAJ3  | TRBV20-1 | TRBJ1-1 |              | 99          | 48          | 4.5E-06          |
| Va26-1 Vb20-1           | TRAV26-1  | TRAJ49 | TRBV20-1 | X       |              | 94          | 48          | 1.1E-05          |
| Va26-1 Vb20-1           | X         | TRAJ29 | TRBV20-1 | TRBJ1-1 |              | 116         | 61          | 1.3E-05          |
| Va26-1 Vb20-1           | TRAV12-3  | TRAJ48 | TRBV20-1 | X       |              | 62          | 26          | 1.5E-05          |
| Va26-1 Vb20-1           | TRAV9-2   | TRAJ23 | TRBV20-1 | X       |              | 98          | 52          | 2.6E-05          |
| Va26-1 Vb20-1           | TRAV26-1  | TRAJ23 | TRBV20-1 | X       |              | 98          | 52          | 4.2E-05          |
| Va26-1 Vb20-1           | TRAV12-3  | X      | TRBV20-1 | TRBJ2-5 |              | 200         | 128         | 7.3E-05          |

|                          |           |        |          |         |      |     |     |         |
|--------------------------|-----------|--------|----------|---------|------|-----|-----|---------|
| Va26-1 Vb20-1            | TRAV12-3  | TRAJ41 | TRBV20-1 | X       |      | 38  | 14  | 1.0E-04 |
| Va26-1 Vb20-1            | TRAV12-3  | TRAJ10 | TRBV20-1 | X       |      | 77  | 38  | 1.4E-04 |
| Va26-1 Vb20-1            | TRAV12-3  | TRAJ23 | TRBV20-1 | X       |      | 79  | 40  | 2.9E-04 |
| Va26-1 Vb20-1            | TRAV4     | TRAJ15 | TRBV20-1 | X       |      | 40  | 15  | 4.9E-04 |
| Va26-1 Vb20-1            | TRAV6     | TRAJ23 | TRBV20-1 | X       |      | 58  | 27  | 6.3E-04 |
| Va26-1 Vb20-1            | TRAV26-1  | TRAJ30 | TRBV20-1 | X       |      | 70  | 35  | 1.2E-03 |
| Va26-1 Vb20-1            | X         | TRAJ24 | TRBV20-1 | TRBJ2-5 |      | 94  | 50  | 1.2E-03 |
| Va26-1 Vb20-1            | TRAV13-1  | X      | TRBV20-1 | TRBJ2-1 |      | 382 | 288 | 2.4E-03 |
| Va26-1 Vb20-1            | X         | TRAJ23 | TRBV20-1 | TRBJ2-1 |      | 230 | 159 | 2.8E-03 |
| Va26-1 Vb20-1            | TRAV26-1  | TRAJ29 | TRBV20-1 | X       |      | 80  | 43  | 4.6E-03 |
| Va26-1 Vb20-1            | TRAV26-1  | X      | TRBV20-1 | TRBJ2-7 |      | 365 | 276 | 7.0E-03 |
| Va26-1 Vb20-1            | TRAV26-1  | TRAJ39 | TRBV20-1 | X       |      | 92  | 53  | 7.2E-03 |
| Va26-1 Vb20-1            | TRAV12-3  | TRAJ18 | X        | TRBJ2-3 |      | 40  | 17  | 7.8E-03 |
| Va26-1 Vb20-1            | TRAV26-1  | TRAJ43 | TRBV20-1 | X       |      | 77  | 42  | 1.1E-02 |
| Va26-1 Vb20-1            | X         | TRAJ15 | TRBV20-1 | TRBJ2-1 |      | 161 | 106 | 2.0E-02 |
| Va26-1 Vb20-1            | TRAV12-3  | TRAJ11 | TRBV20-1 | X       |      | 55  | 27  | 2.9E-02 |
| Va26-1 Vb20-1            | TRAV26-1  | TRAJ41 | TRBV20-1 | X       |      | 57  | 29  | 3.0E-02 |
| Va26-1 Vb20-1            | TRAV26-1  | TRAJ34 | TRBV20-1 | X       |      | 75  | 41  | 4.2E-02 |
| Va26-1 Vb20-1            | TRAV1-1   | TRAJ24 | X        | TRBJ2-5 |      | 38  | 16  | 4.6E-02 |
| Va24 Ja18 Vb28 Jb2-3     | TRAV24    | TRAJ18 | TRBV28   | X       |      | 21  | 4   | 2.1E-05 |
| Va24 Ja18 Vb28 Jb2-3     | TRAV24    | TRAJ18 | X        | TRBJ2-3 |      | 25  | 9   | 3.1E-02 |
| Va14DV4 Ja22 Vb15 Jb2-3  | TRAV14DV4 | TRAJ22 | TRBV15   | X       |      | 30  | 4   | 0.0E+00 |
| Va14DV4 Ja22 Vb15 Jb2-3  | TRAV14DV4 | X      | TRBV15   | TRBJ2-3 |      | 52  | 17  | 1.1E-07 |
| Va14DV4 Ja22 Vb15 Jb2-3  | TRAV14DV4 | TRAJ22 | X        | TRBJ2-3 |      | 73  | 32  | 6.7E-07 |
| Va13-2 Ja31 Vb29-1 Jb2-3 | TRAV13-2  | TRAJ31 | TRBV29-1 | X       |      | 25  | 6   | 2.2E-05 |
| Va13-2 Ja31 Vb29-1 Jb2-3 | TRAV13-2  | X      | TRBV29-1 | TRBJ2-3 |      | 59  | 29  | 3.6E-02 |
| Va13-1 Ja56 Vb10-3       | TRAV13-1  | TRAJ56 | TRBV10-3 | X       |      | 32  | 2   | 0.0E+00 |
| Va13-1 Ja56 Vb10-3       | TRAV13-2  | TRAJ56 | TRBV10-3 | X       |      | 12  | 1   | 1.8E-04 |
| Va13-1 Ja56 Vb10-3       | X         | TRAJ56 | TRBV10-3 | TRBJ2-7 |      | 24  | 7   | 2.7E-02 |
| Va12-1 Ja18 Vb30 Jb2-1   | TRAV12-1  | TRAJ18 | TRBV30   | X       |      | 22  | 4   | 9.5E-05 |
| Va12-1 Ja18 Vb30 Jb2-1   | X         | TRAJ18 | TRBV30   | TRBJ2-1 |      | 27  | 9   | 3.2E-02 |
| Va1-2 Ja33 Vb6-4         | TRAV1-2   | TRAJ12 | TRBV6-4  | X       | MAIT | 29  | 1   | 0.0E+00 |
| Va1-2 Ja33 Vb6-4         | TRAV1-2   | TRAJ20 | TRBV6-4  | X       | MAIT | 91  | 3   | 0.0E+00 |
| Va1-2 Ja33 Vb6-4         | TRAV1-2   | TRAJ33 | TRBV6-4  | X       | MAIT | 141 | 4   | 0.0E+00 |
| Va1-2 Ja33 Vb6-4         | TRAV1-2   | X      | TRBV6-4  | TRBJ2-1 |      | 138 | 13  | 0.0E+00 |
| Va1-2 Ja33 Vb6-4         | TRAV1-2   | X      | TRBV6-4  | TRBJ2-2 |      | 35  | 3   | 0.0E+00 |
| Va1-2 Ja33 Vb6-4         | TRAV1-2   | X      | TRBV6-4  | TRBJ2-3 |      | 107 | 10  | 0.0E+00 |
| Va1-2 Ja33 Vb6-4         | X         | TRAJ20 | TRBV6-4  | TRBJ2-1 |      | 53  | 14  | 0.0E+00 |
| Va1-2 Ja33 Vb6-4         | X         | TRAJ33 | TRBV6-4  | TRBJ2-1 |      | 74  | 10  | 0.0E+00 |
| Va1-2 Ja33 Vb6-4         | X         | TRAJ33 | TRBV6-4  | TRBJ2-3 |      | 49  | 8   | 0.0E+00 |
| Va1-2 Ja33 Vb6-4         | X         | TRAJ20 | TRBV6-4  | TRBJ2-3 |      | 45  | 11  | 3.3E-11 |

|                  |             |        |          |         |      |     |     |         |
|------------------|-------------|--------|----------|---------|------|-----|-----|---------|
| Va1-2 Ja33 Vb6-4 | TRAV1-2     | TRAJ41 | TRBV6-4  | X       |      | 12  | 1   | 3.1E-08 |
| Va1-2 Ja33 Vb6-4 | X           | TRAJ33 | TRBV6-4  | TRBJ2-2 |      | 19  | 3   | 1.4E-06 |
| Va1-2 Ja33 Vb6-4 | TRAV1-2     | TRAJ33 | X        | TRBJ2-1 |      | 194 | 125 | 2.3E-05 |
| Va1-2 Ja33 Vb6-4 | TRAV1-2     | X      | TRBV6-4  | TRBJ2-6 |      | 12  | 1   | 2.9E-05 |
| Va1-2 Ja33 Vb6-4 | TRAV1-2     | TRAJ33 | X        | TRBJ2-6 |      | 43  | 15  | 7.4E-05 |
| Va1-2 Ja33 Vb6-4 | TRAV1-2     | TRAJ33 | TRBV4-2  | X       |      | 41  | 14  | 1.5E-04 |
| Va1-2 Ja33 Vb6-4 | TRAV1-2     | TRAJ33 | TRBV20-1 | X       |      | 135 | 82  | 3.9E-04 |
| Va1-2 Ja33 Vb6-4 | TRAV1-2     | TRAJ33 | TRBV4-3  | X       |      | 44  | 19  | 1.8E-02 |
| Va1-2 Ja33 Vb6-4 | TRAV1-2     | X      | TRBV4-2  | TRBJ2-1 |      | 51  | 24  | 4.0E-02 |
| Singleton        | TRAV10      | TRAJ18 | TRBV25-1 | X       | iNKT | 23  | 0   | 0.0E+00 |
| Singleton        | TRAV20      | X      | TRBV6-2  | TRBJ1-1 |      | 44  | 9   | 0.0E+00 |
| Singleton        | TRAV20      | X      | TRBV6-3  | TRBJ1-1 |      | 44  | 9   | 0.0E+00 |
| Singleton        | TRAV41      | TRAJ50 | TRBV2    | X       |      | 15  | 1   | 1.6E-10 |
| Singleton        | TRAV21      | X      | TRBV27   | TRBJ2-3 |      | 104 | 46  | 2.5E-09 |
| Singleton        | TRAV8-1     | TRAJ34 | TRBV28   | X       |      | 37  | 10  | 2.8E-07 |
| Singleton        | TRAV8-3     | TRAJ34 | TRBV15   | X       |      | 27  | 5   | 5.2E-07 |
| Singleton        | TRAV22      | X      | TRBV29-1 | TRBJ2-7 |      | 50  | 17  | 1.4E-06 |
| Singleton        | TRAV20      | TRAJ22 | TRBV30   | X       |      | 25  | 5   | 2.0E-06 |
| Singleton        | TRAV38-2DV8 | TRAJ9  | TRBV7-9  | X       |      | 15  | 2   | 3.4E-06 |
| Singleton        | TRAV12-1    | TRAJ48 | TRBV24-1 | X       |      | 20  | 3   | 4.6E-06 |
| Singleton        | TRAV26-2    | X      | TRBV27   | TRBJ1-1 |      | 50  | 18  | 1.9E-05 |
| Singleton        | TRAV1-1     | X      | TRBV28   | TRBJ2-7 |      | 101 | 52  | 4.3E-05 |
| Singleton        | TRAV13-2    | TRAJ6  | TRBV14   | X       |      | 20  | 4   | 4.4E-05 |
| Singleton        | TRAV34      | TRAJ26 | X        | TRBJ1-6 |      | 13  | 2   | 5.9E-05 |
| Singleton        | TRAV6       | TRAJ16 | TRBV20-1 | X       |      | 40  | 15  | 7.2E-05 |
| Singleton        | TRAV14DV4   | TRAJ28 | TRBV9    | X       |      | 33  | 10  | 7.7E-05 |
| Singleton        | TRAV39      | TRAJ45 | TRBV20-1 | X       |      | 61  | 28  | 1.7E-04 |
| Singleton        | TRAV26-1    | TRAJ28 | TRBV9    | X       |      | 36  | 12  | 3.3E-04 |
| Singleton        | X           | TRAJ4  | TRBV29-1 | TRBJ2-5 |      | 46  | 17  | 4.8E-04 |
| Singleton        | TRAV8-3     | TRAJ21 | TRBV14   | X       |      | 14  | 2   | 5.1E-04 |
| Singleton        | TRAV3       | TRAJ42 | TRBV30   | X       |      | 22  | 5   | 7.3E-04 |
| Singleton        | TRAV25      | X      | TRBV19   | TRBJ1-5 |      | 65  | 30  | 7.8E-04 |
| Singleton        | TRAV12-1    | TRAJ17 | TRBV2    | X       |      | 30  | 9   | 9.2E-04 |
| Singleton        | TRAV2       | TRAJ15 | TRBV2    | X       |      | 31  | 10  | 1.0E-03 |
| Singleton        | TRAV5       | TRAJ34 | TRBV28   | X       |      | 35  | 12  | 1.1E-03 |
| Singleton        | TRAV35      | TRAJ42 | X        | TRBJ1-2 |      | 68  | 34  | 1.1E-03 |
| Singleton        | TRAV25      | TRAJ11 | TRBV7-9  | X       |      | 18  | 4   | 1.5E-03 |
| Singleton        | TRAV8-3     | TRAJ8  | TRBV28   | X       |      | 36  | 13  | 1.6E-03 |
| Singleton        | TRAV12-1    | TRAJ43 | X        | TRBJ1-1 |      | 89  | 48  | 1.8E-03 |
| Singleton        | TRAV29DV5   | X      | TRBV7-9  | TRBJ1-2 |      | 89  | 48  | 2.0E-03 |
| Singleton        | TRAV13-2    | TRAJ18 | TRBV24-1 | X       |      | 10  | 1   | 2.1E-03 |

|           |           |        |          |         |  |     |    |         |
|-----------|-----------|--------|----------|---------|--|-----|----|---------|
| Singleton | TRAV13-2  | X      | TRBV7-2  | TRBJ1-5 |  | 57  | 26 | 2.3E-03 |
| Singleton | TRAV8-3   | TRAJ49 | X        | TRBJ2-4 |  | 24  | 7  | 2.6E-03 |
| Singleton | TRAV9-2   | TRAJ57 | TRBV12-5 | X       |  | 12  | 2  | 3.5E-03 |
| Singleton | TRAV8-1   | TRAJ6  | TRBV30   | X       |  | 20  | 5  | 3.7E-03 |
| Singleton | TRAV10    | TRAJ12 | TRBV7-9  | X       |  | 13  | 2  | 4.3E-03 |
| Singleton | TRAV13-2  | X      | TRBV7-8  | TRBJ1-5 |  | 52  | 23 | 4.3E-03 |
| Singleton | TRAV41    | X      | TRBV14   | TRBJ1-1 |  | 27  | 8  | 4.5E-03 |
| Singleton | TRAV14DV4 | TRAJ54 | TRBV18   | X       |  | 25  | 7  | 4.7E-03 |
| Singleton | TRAV13-1  | TRAJ30 | TRBV7-3  | X       |  | 17  | 4  | 6.1E-03 |
| Singleton | TRAV36DV7 | TRAJ23 | X        | TRBJ1-4 |  | 10  | 1  | 6.2E-03 |
| Singleton | TRAV8-3   | TRAJ20 | X        | TRBJ2-5 |  | 77  | 41 | 6.5E-03 |
| Singleton | TRAV23DV6 | TRAJ41 | TRBV5-1  | X       |  | 21  | 6  | 6.7E-03 |
| Singleton | TRAV1-1   | X      | TRBV30   | TRBJ2-7 |  | 48  | 21 | 7.7E-03 |
| Singleton | X         | TRAJ27 | TRBV2    | TRBJ2-4 |  | 19  | 5  | 8.3E-03 |
| Singleton | X         | TRAJ40 | TRBV10-3 | TRBJ1-5 |  | 27  | 9  | 8.6E-03 |
| Singleton | X         | TRAJ45 | TRBV12-5 | TRBJ2-1 |  | 25  | 8  | 8.7E-03 |
| Singleton | TRAV14DV4 | X      | TRBV20-1 | TRBJ1-5 |  | 121 | 73 | 8.7E-03 |
| Singleton | TRAV25    | X      | TRBV27   | TRBJ1-2 |  | 50  | 22 | 9.1E-03 |
| Singleton | TRAV24    | X      | TRBV19   | TRBJ2-7 |  | 50  | 22 | 9.6E-03 |
| Singleton | X         | TRAJ53 | TRBV24-1 | TRBJ1-5 |  | 24  | 7  | 1.1E-02 |
| Singleton | TRAV6     | TRAJ22 | TRBV14   | X       |  | 13  | 2  | 1.1E-02 |
| Singleton | TRAV9-2   | TRAJ53 | TRBV9    | X       |  | 55  | 25 | 1.1E-02 |
| Singleton | TRAV4     | TRAJ9  | TRBV13   | X       |  | 11  | 2  | 1.3E-02 |
| Singleton | TRAV14DV4 | TRAJ39 | TRBV24-1 | X       |  | 15  | 3  | 1.4E-02 |
| Singleton | TRAV13-2  | X      | TRBV2    | TRBJ1-5 |  | 64  | 32 | 1.5E-02 |
| Singleton | TRAV22    | TRAJ28 | TRBV5-8  | X       |  | 12  | 2  | 1.7E-02 |
| Singleton | TRAV22    | TRAJ28 | TRBV5-4  | X       |  | 12  | 2  | 1.7E-02 |
| Singleton | TRAV27    | TRAJ39 | X        | TRBJ1-2 |  | 45  | 20 | 2.2E-02 |
| Singleton | X         | TRAJ7  | TRBV15   | TRBJ2-7 |  | 21  | 6  | 2.4E-02 |
| Singleton | TRAV12-1  | TRAJ45 | TRBV18   | X       |  | 26  | 8  | 2.7E-02 |
| Singleton | TRAV1-1   | TRAJ13 | X        | TRBJ1-2 |  | 42  | 19 | 2.8E-02 |
| Singleton | TRAV25    | X      | TRBV19   | TRBJ2-1 |  | 81  | 44 | 2.9E-02 |
| Singleton | TRAV29DV5 | X      | TRBV16   | TRBJ1-1 |  | 11  | 2  | 3.1E-02 |
| Singleton | TRAV41    | TRAJ43 | TRBV18   | X       |  | 19  | 5  | 3.1E-02 |
| Singleton | TRAV21    | TRAJ18 | TRBV7-3  | X       |  | 11  | 2  | 3.4E-02 |
| Singleton | X         | TRAJ45 | TRBV2    | TRBJ2-1 |  | 72  | 38 | 3.4E-02 |
| Singleton | TRAV8-2   | X      | TRBV14   | TRBJ2-1 |  | 44  | 19 | 3.4E-02 |
| Singleton | TRAV8-4   | X      | TRBV14   | TRBJ2-1 |  | 44  | 19 | 3.5E-02 |
| Singleton | TRAV12-2  | TRAJ13 | TRBV25-1 | X       |  | 13  | 2  | 3.5E-02 |
| Singleton | TRAV2     | TRAJ13 | TRBV28   | X       |  | 37  | 15 | 4.1E-02 |
